# Supplementary material for: The joint protective function of live- and dead-Lactobacillus plantarum GKD7 on anterior cruciate ligament transection induces osteoarthritis
Source: publisher site journal article supplement (doi:10.18632/aging.206101), 2024-09-05
Supplement: Supplementary file [file aging-v16i18-206101-supplementary-material-SD1.pdf]

## IL-1 $\beta$

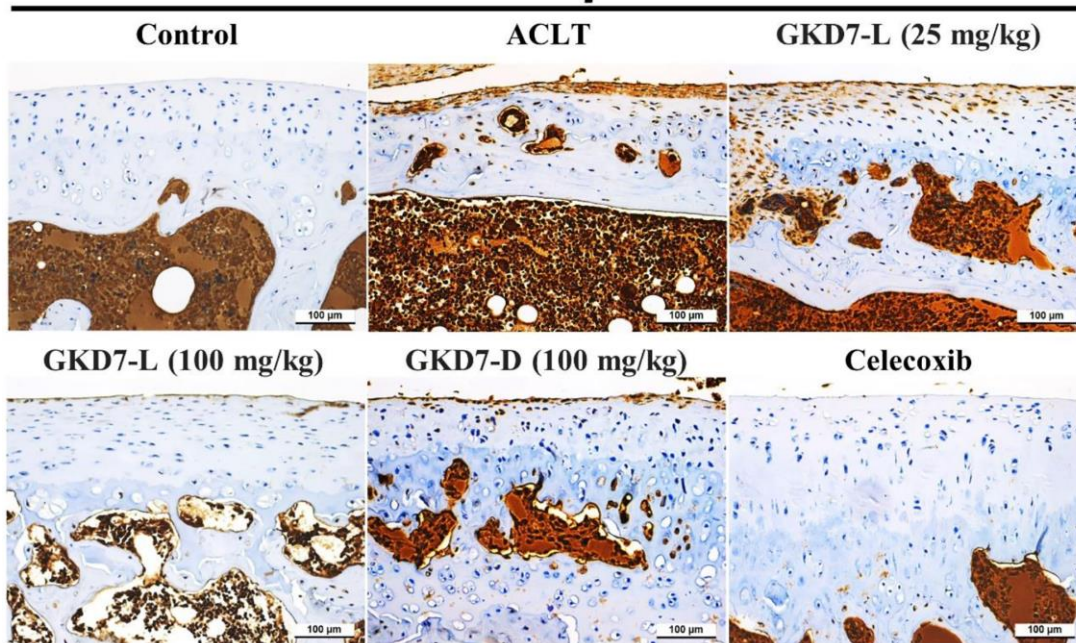

**Supplementary Figure 1. GKD7-L and GKD7-D reduce ACLT-induced IL-1 $\beta$  production in cartilage.** Histological sections of joints were IHC stained with IL-1 $\beta$ . Scale bar = 100  $\mu$ m.

## TNF- $\alpha$

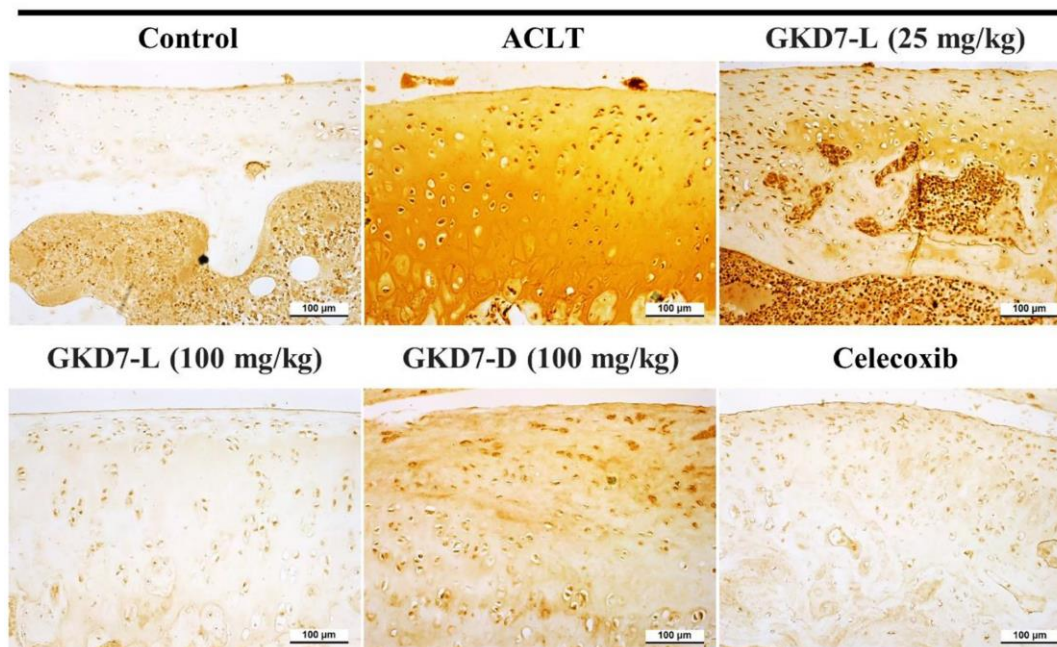

**Supplementary Figure 2. GKD7-L and GKD7-D reduce ACLT-induced TNF- $\alpha$  production in cartilage.** Histological sections of joints were IHC stained with TNF- $\alpha$ .

# MMP3

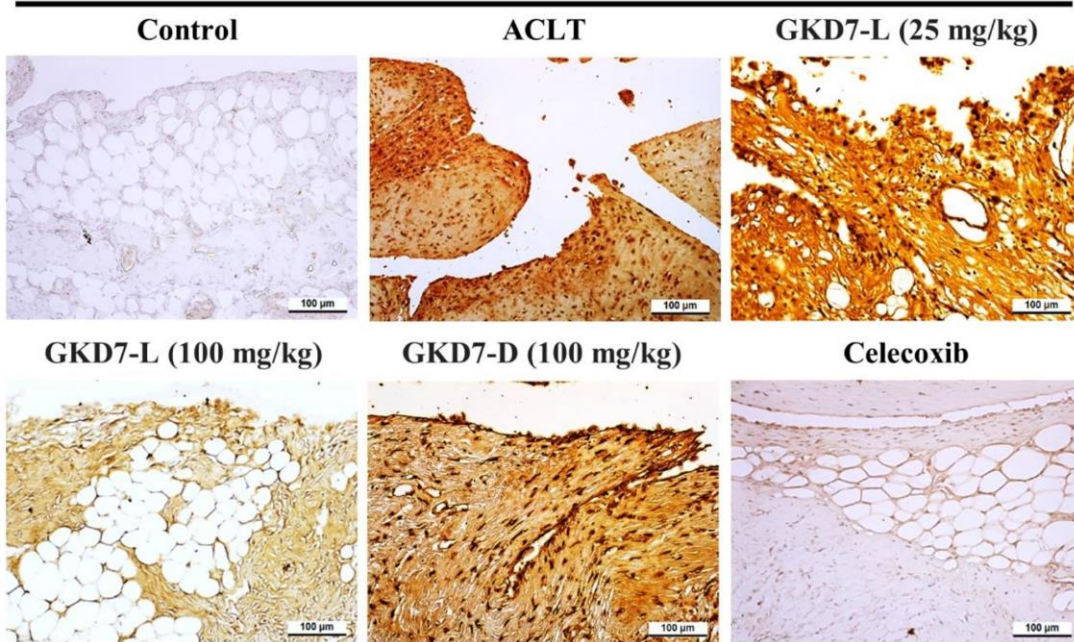

**Supplementary Figure 3. GKD7-L and GKD7-D reduce ACLT-induced MMP3 production in synovial tissue.** Histological sections of joints were IHC stained with MMP3. Scale bar = 100 µm.
